# Supplementary material for: Thermophysical properties of polyethylene glycol oligomers via molecular dynamics simulations
Source: Royal Society of Chemistry journal article supplement (doi:10.1039/d4ra04898a), 2024-01-01
Supplement: d4ra04898a1.pdf [file d4ra04898a1.pdf]

# SUPPORTING INFORMATION:

## Thermophysical Properties of Polyethylene Glycol Oligomers via Molecular Dynamics Simulations

Thi H. Ho,<sup>\*,†,‡</sup> Hien Duy Tong,<sup>¶</sup> Øivind Wilhelmsen,<sup>§</sup> and Thuat T. Trinh<sup>\*,§</sup>

*†Laboratory for Computational Physics, Institute for Computational Science and Artificial  
Intelligence, Van Lang University, Ho Chi Minh City, Vietnam*

*‡Faculty of Mechanical - Electrical and Computer Engineering, School of Technology, Van  
Lang University, Ho Chi Minh City, Vietnam*

*¶Faculty of Engineering, Vietnamese-German University (VGU), Thu Dau Mot City, Binh  
Duong Province 75000, Vietnam*

*§Porelab, Department of Chemistry, Norwegian University of Science and  
Technology, Trondheim, Norway*

E-mail: thi.hohuynh@vlu.edu.vn; thuat.trinh@ntnu.no

Table S1: Force field coefficients for bond stretching.

| Chemical group       | Bonding Coeff. | K (kcal/Å <sup>2</sup> ) | $r_0$ (Å) |
|----------------------|----------------|--------------------------|-----------|
| Hydroxyl ( $-O-H$ )  | $O-H$          | 371.40                   | 0.97      |
|                      | $C-O$          | 316.70                   | 1.42      |
| Ether ( $-CH_2-O-$ ) | $C-C$          | 300.90                   | 1.54      |
|                      | $C-H$          | 330.60                   | 1.10      |
|                      | $C-O$          | 308.60                   | 1.43      |

Table S2: Force field coefficients for angle bending. Note that  $H_O$  represents the hydrogen atom in the hydroxyl group,  $H_C$  denotes the hydrogen atom on the ether linkage.

| Chemical group       | Angle Coeff. | K (kcal) | $\theta_0$ (degree) |
|----------------------|--------------|----------|---------------------|
| Hydroxyl ( $-O-H$ )  | $C-C-O$      | 67.50    | 110.19              |
|                      | $C-O-H_O$    | 47.40    | 107.26              |
|                      | $H_C-C-O$    | 50.90    | 110.26              |
| Ether ( $-CH_2-O-$ ) | $C-C-H_C$    | 46.40    | 109.56              |
|                      | $C-C-O$      | 68.00    | 107.97              |
|                      | $C-O-C$      | 62.70    | 112.48              |
|                      | $H_C-C-H_C$  | 39.20    | 108.46              |
|                      | $H_C-C-O$    | 50.80    | 109.78              |

Table S3: Force field coefficients for dihedral torsion. Note that  $H_O$  represents the hydrogen atom in the hydroxyl group,  $H_C$  denotes the hydrogen atom on the ether linkage,  $O_H$  is the oxygen atom within the hydroxyl group, and  $O_E$  is the oxygen atom in the ether linkage.

| Chemical group       | Dihedral Coeff. | K (kcal) | n | d (degree) |
|----------------------|-----------------|----------|---|------------|
| Hydroxyl ( $-O-H$ )  | $C-C-O-H_O$     | 0.25     | 1 | 0          |
|                      | $H_C-C-C-O$     | 0.25     | 1 | 0          |
|                      | $H_C-C-O-H_O$   | 0.17     | 3 | 0          |
|                      | $O-C-C-O_E$     | 1.18     | 2 | 0          |
| Ether ( $-CH_2-O-$ ) | $C-C-O-C$       | 0.10     | 2 | 180        |
|                      | $C-O-C-H_C$     | 0.38     | 3 | 0          |
|                      | $H_C-C-C-H_C$   | 0.16     | 3 | 0          |
|                      | $H_C-C-C-O$     | 0.25     | 1 | 0          |
|                      | $O-C-C-O_H$     | 1.18     | 2 | 0          |
